# Supplementary material
Source: Royal Society of Chemistry journal article supplement (https://www.rsc.org/suppdata/cp/1999/3097/tables1.doc)
Supplement: Supplementary file 1 [file tables1.doc]

**Table S1**. Observed and calculated rotational transition frequencies of three isotopomers of OCICl.

| J´ |  | *J´´* |  | 2*F*1´ | 2*F*´ |  | 2*F*1´´ | 2*F*´´ |  | OCI35Cl | |  | OCI37Cl | |  | | O13CI35Cl | |
| --- | --- | --- | --- | --- | --- | --- | --- | --- | --- | --- | --- | --- | --- | --- | --- | --- | --- | --- |
|  |  |  |  |  |  |  |  |  |  | obs(MHz) | kHza | obs(MHz) | | kHza | | obs(MHz) | | kHza |
| 4 |  | 3 |  | 13 | 16 |  | 11 | 14 |  | 7130.4022 | 1.0 | - | | - | | - | | - |
|  |  |  |  | 13 | 14 |  | 11 | 12 |  | 7129.3545 | 0.4 | - | | - | | - | | - |
|  |  |  |  | 13 | 12 |  | 11 | 10 |  | 7128.9263 | -0.5 | - | | - | | - | | - |
|  |  |  |  | 13 | 10 |  | 11 | 8 |  | 7129.9200 | -0.6 | - | | - | | - | | - |
|  |  |  |  | 11 | 14 |  | 9 | 12 |  | 7148.5014 | 1.9 | - | | - | | - | | - |
|  |  |  |  | 11 | 12 |  | 9 | 10 |  | 7147.9310 | 0.0 | - | | - | | - | | - |
|  |  |  |  | 11 | 10 |  | 9 | 8 |  | 7145.8589 | -3.8 | - | | - | | - | | - |
|  |  |  |  | 9 | 12 |  | 7 | 10 |  | 7069.4605 | 0.6 | - | | - | | - | | - |
|  |  |  |  | 9 | 10 |  | 7 | 8 |  | 7066.8207 | 0.1 | - | | - | | - | | - |
|  |  |  |  | 7 | 10 |  | 5 | 8 |  | 7012.9349 | 1.3 | - | | - | | - | | - |
| 5 |  | 4 |  | 15 | 18 |  | 13 | 16 |  | 8898.1568 | 0.5 | 8718.4664 | | -1.1 | | 8771.2870 | | 0.1 |
|  |  |  |  | 15 | 16 |  | 13 | 14 |  | 8897.5364 | 0.7 | 8717.9807 | | 0.1 | | 8770.6661 | | 0.4 |
|  |  |  |  | 15 | 14 |  | 13 | 12 |  | 8897.1505 | -1.0 | 8717.6778 | | 0.6 | | 8770.2821 | | 0.5 |
|  |  |  |  | 15 | 12 |  | 13 | 10 |  | 8897.7337 | 0.3 | 8718.1385 | | -1.4 | | 8770.8635 | | -0.6 |
|  |  |  |  | 13 | 16 |  | 11 | 14 |  | 8910.9293 | 0.7 | 8731.1077 | | -1.1 | | 8784.0551 | | 0.1 |
|  |  |  |  | 13 | 14 |  | 11 | 12 |  | 8907.7843 | -0.1 | 8728.8451 | | 2.6 | | 8780.8958 | | 0.1 |
|  |  |  |  | 13 | 12 |  | 11 | 10 |  | 8908.7325 | -0.3 | 8729.3931 | | -0.3 | | 8781.8571 | | -0.8 |
|  |  |  |  | 13 | 10 |  | 11 | 8 |  | 8910.0499 | -0.3 | 8730.5102 | | 0.0 | | 8783.1734 | | 2.7 |
|  |  |  |  | 11 | 14 |  | 9 | 12 |  | 8870.6163 | 0.8 | 8690.1286 | | -0.2 | | 8743.6519 | | 0.0 |
|  |  |  |  | 11 | 12 |  | 9 | 10 |  | 8866.5979 | 0.6 | 8687.1584 | | 2.0 | | 8739.6244 | | 1.0 |
|  |  |  |  | 11 | 10 |  | 9 | 8 |  | 8867.5624 | 0.3 | 8687.8405 | | -1.6 | | 8740.5929 | | 0.5 |
|  |  |  |  | 11 | 8 |  | 9 | 6 |  | 8869.7651 | 0.5 | 8689.6714 | | 0.2 | | 8742.7851 | | -0.4 |
|  |  |  |  | 9 | 12 |  | 7 | 10 |  | 8831.1438 | 0.0 | 8651.0797 | | 0.0 | | 8704.1981 | | -0.3 |
|  |  |  |  | 9 | 10 |  | 7 | 8 |  | 8827.1765 | -2.6 | 8647.9563 | | 1.2 | | 8700.2365 | | -1.3 |
|  |  |  |  | 9 | 8 |  | 7 | 6 |  | 8827.8259 | -0.7 | 8648.4515 | | -1.3 | | 8700.8844 | | 0.9 |
|  |  |  |  | 9 | 6 |  | 7 | 4 |  | 8831.7795 | 1.2 | 8651.5705 | | 1.3 | | 8704.8307 | | -0.3 |
|  |  |  |  | 9 | 6 |  | 7 | 6 |  | 8838.5871 | 0.3 | - | | - | | - | | - |
|  |  |  |  | 7 | 10 |  | 5 | 8 |  | 8818.9183 | -0.7 | 8638.8790 | | 4.4 | | 8692.0131 | | -1.9 |
|  |  |  |  | 7 | 8 |  | 5 | 6 |  | 8814.2669 | -0.8 | 8635.2067 | | -2.1 | | 8687.3666 | | -1.1 |
|  |  |  |  | 7 | 6 |  | 5 | 4 |  | 8815.0567 | 0.1 | 8635.8146 | | -1.1 | | 8688.1558 | | 1.8 |
|  |  |  |  | 7 | 4 |  | 5 | 2 |  | 8819.7642 | 0.2 | - | | - | | 8692.8571 | | -0.2 |
|  |  |  |  | 5 | 8 |  | 3 | 6 |  | 8847.6359 | -0.7 | 8667.6180 | | -1.9 | | 8720.7432 | | 0.3 |
|  |  |  |  | 5 | 6 |  | 3 | 4 |  | 8843.8827 | -1.5 | 8664.6734 | | -0.2 | | 8716.9924 | | -0.4 |
|  |  |  |  | 5 | 4 |  | 3 | 2 |  | 8840.8586 | -0.7 | - | | - | | 8713.9656 | | -0.4 |
|  |  |  |  | 5 | 6 |  | 3 | 6 |  | 8832.2068 | 0.8 | - | | - | | - | | - |
|  |  |  |  | 5 | 4 |  | 3 | 4 |  | 8852.7149 | 0.7 | - | | - | | - | | - |
|  |  |  |  | 5 | 2 |  | 3 | 2 |  | 8856.0055 | 0.6 | - | | - | | - | | - |
|  |  |  |  | 11 | 14 |  | 11 | 12 |  | 8837.8913 | -1.4 | - | | - | | - | | - |
|  |  |  |  | 11 | 14 |  | 11 | 14 |  | - | - | - | | - | | 8700.0894 | | 0.9 |
|  |  |  |  | 11 | 10 |  | 11 | 10 |  | 8826.8121 | 1.1 | - | | - | | - | | - |
|  |  |  |  | 11 | 8 |  | 11 | 8 |  | 8825.4174 | 0.4 | - | | - | | - | | - |
|  |  |  |  | 9 | 12 |  | 9 | 12 |  | 9043.3158 | -1.6 | - | | - | | 8916.4390 | | -2.7 |
|  |  |  |  | 9 | 10 |  | 9 | 10 |  | 9039.8898 | -1.3 | - | | - | | 8912.9980 | | -3.0 |
|  |  |  |  | 9 | 8 |  | 9 | 8 |  | 9041.9442 | 0.8 | - | | - | | 8915.0648 | | 5.7 |
|  |  |  |  | 9 | 6 |  | 9 | 6 |  | 9041.9943 | 2.1 | - | | - | | - | | - |
|  |  |  |  | 7 | 10 |  | 7 | 10 |  | 9134.4835 | -1.3 | - | | - | | 9007.5101 | | -1.7 |
|  |  |  |  | 7 | 8 |  | 7 | 8 |  | 9130.3800 | -0.8 | - | | - | | - | | - |
|  |  |  |  | 7 | 6 |  | 7 | 6 |  | 9131.9776 | 3.6 | - | | - | | - | | - |
|  |  |  |  | 5 | 8 |  | 5 | 8 |  | 9158.2597 | -1.0 | - | | - | | - | | - |

[Continued]

**Table S1**. (Continued)

| J´ |  | *J´´* |  | 2*F*1´ | 2*F*´ |  | 2*F*1´´ | 2*F*´´ |  | OCI35Cl | |  | OCI37Cl | |  | | O13CI35Cl | |
| --- | --- | --- | --- | --- | --- | --- | --- | --- | --- | --- | --- | --- | --- | --- | --- | --- | --- | --- |
|  |  |  |  |  |  |  |  |  |  | obs(MHz) | kHza | obs(MHz) | | kHza | | obs(MHz) | | kHza |
| 6 |  | 5 |  | 17 | 20 |  | 15 | 18 |  | 10669.2212 | 1.3 | 10453.6193 | | -1.2 | | 10516.9622 | | 0.5 |
|  |  |  |  | 17 | 18 |  | 15 | 16 |  | 10668.8229 | 1.0 | 10453.3110 | | 2.5 | | 10516.5675 | | 4.2 |
|  |  |  |  | 17 | 16 |  | 15 | 14 |  | 10668.4920 | -0.4 | 10453.0473 | | -0.7 | | 10516.2339 | | -0.1 |
|  |  |  |  | 17 | 14 |  | 15 | 12 |  | 10668.8587 | -4.4 | 10453.3390 | | -4.0 | | 10516.5980 | | -7.0 |
|  |  |  |  | 15 | 18 |  | 13 | 16 |  | 10678.6891 | 0.6 | 10463.0085 | | 1.3 | | 10526.4312 | | 1.5 |
|  |  |  |  | 15 | 16 |  | 13 | 14 |  | 10677.1629 | 4.4 | 10461.8495 | | -1.2 | | 10524.9005 | | 2.3 |
|  |  |  |  | 15 | 14 |  | 13 | 12 |  | 10677.2081 | -3.6 | 10461.8495 | | 3.3 | | 10524.9493 | | -3.6 |
|  |  |  |  | 15 | 12 |  | 13 | 10 |  | 10678.1719 | 0.3 | 10462.6654 | | 1.6 | | 10525.9151 | | 1.2 |
|  |  |  |  | 13 | 16 |  | 11 | 14 |  | 10652.9753 | -0.1 | 10437.0523 | | 0.2 | | 10500.6576 | | 0.4 |
|  |  |  |  | 13 | 14 |  | 11 | 12 |  | 10650.8622 | 1.1 | 10435.4252 | | -2.6 | | 10498.5436 | | 0.7 |
|  |  |  |  | 13 | 12 |  | 11 | 10 |  | 10651.0069 | 1.1 | 10435.5160 | | 2.6 | | 10498.6840 | | -4.1 |
|  |  |  |  | 13 | 10 |  | 11 | 8 |  | 10652.6645 | -1.0 | 10436.8551 | | 0.5 | | 10500.3466 | | 0.8 |
|  |  |  |  | 11 | 14 |  | 9 | 12 |  | 10626.1387 | 1.9 | 10410.2814 | | -2.3 | | 10473.8241 | | 1.5 |
|  |  |  |  | 11 | 12 |  | 9 | 10 |  | 10623.8569 | 1.1 | 10408.4534 | | -0.1 | | 10471.5427 | | 0.7 |
|  |  |  |  | 11 | 10 |  | 9 | 8 |  | 10623.7497 | 1.0 | 10408.3982 | | 1.4 | | 10471.4368 | | 0.8 |
|  |  |  |  | 11 | 8 |  | 9 | 6 |  | 10626.1698 | -2.9 | - | | - | | - | | - |
|  |  |  |  | 9 | 12 |  | 7 | 10 |  | 10616.5410 | -1.3 | 10400.7032 | | -1.7 | | 10464.2529 | | 1.2 |
|  |  |  |  | 9 | 10 |  | 7 | 8 |  | 10614.0225 | -2.2 | 10398.7178 | | 1.7 | | 10461.7353 | | -0.9 |
|  |  |  |  | 9 | 8 |  | 7 | 6 |  | 10613.7677 | -0.4 | 10398.5178 | | 0.3 | | 10461.4800 | | 1.2 |
|  |  |  |  | 9 | 6 |  | 7 | 4 |  | 10616.4145 | 1.5 | - | | - | | 10464.1206 | | -0.9 |
|  |  |  |  | 7 | 10 |  | 5 | 8 |  | 10635.1150 | -0.1 | 10419.3197 | | 2.4 | | 10482.8341 | | -2.2 |
|  |  |  |  | 7 | 8 |  | 5 | 6 |  | 10633.4532 | 0.8 | 10418.0044 | | -3.0 | | 10481.1731 | | -1.6 |
|  |  |  |  | 7 | 6 |  | 5 | 4 |  | 10631.5812 | 1.1 | - | | - | | 10479.3017 | | -0.4 |
|  |  |  |  | 7 | 4 |  | 5 | 2 |  | - | - | - | | - | | 10481.0380 | | 1.9 |
|  |  |  |  | 13 | 16 |  | 13 | 16 |  | - | - | - | | - | | 10416.6912 | | 0.5 |
|  |  |  |  | 13 | 14 |  | 13 | 14 |  | - | - | - | | - | | 10416.5053 | | 1.0 |
|  |  |  |  | 13 | 12 |  | 13 | 12 |  | - | - | - | | - | | 10416.9983 | | -0.9 |
|  |  |  |  | 13 | 10 |  | 13 | 10 |  | - | - | - | | - | | 10415.9495 | | -0.1 |
|  |  |  |  | 11 | 14 |  | 11 | 14 |  | 10798.8382 | -0.6 | - | | - | | 10646.6122 | | -0.2 |
|  |  |  |  | 11 | 12 |  | 11 | 12 |  | - | - | - | | - | | 10644.9190 | | -0.6 |
|  |  |  |  | 11 | 10 |  | 11 | 10 |  | - | - | - | | - | | 10645.9041 | | 1.4 |
|  |  |  |  | 9 | 12 |  | 9 | 12 |  | - | - | - | | - | | 10767.5661 | | 1.0 |

a  = obs - calc
